# Supplementary material
Source: PubMed Central journal article supplement (PMC3787713)
Supplement: NIHMS470763-supplement-Supp_Fig_S1-S3.pdf [file NIHMS470763-supplement-Supp_Fig_S1-S3.pdf]

**Fig. S1**

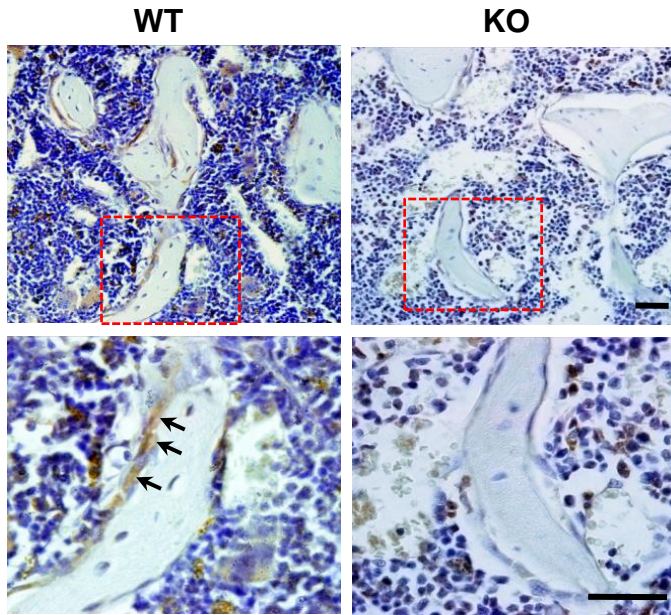

**Fig. S1 Representative images of LRP6 protein expression in distal femurs from WT and KO mice detected by immunohistochemical analysis with an antibody against LRP6. Scale bars: 100 $\mu$ M. Arrows, LRP6<sup>+</sup> cells on bone surface.**

**Fig. S2**

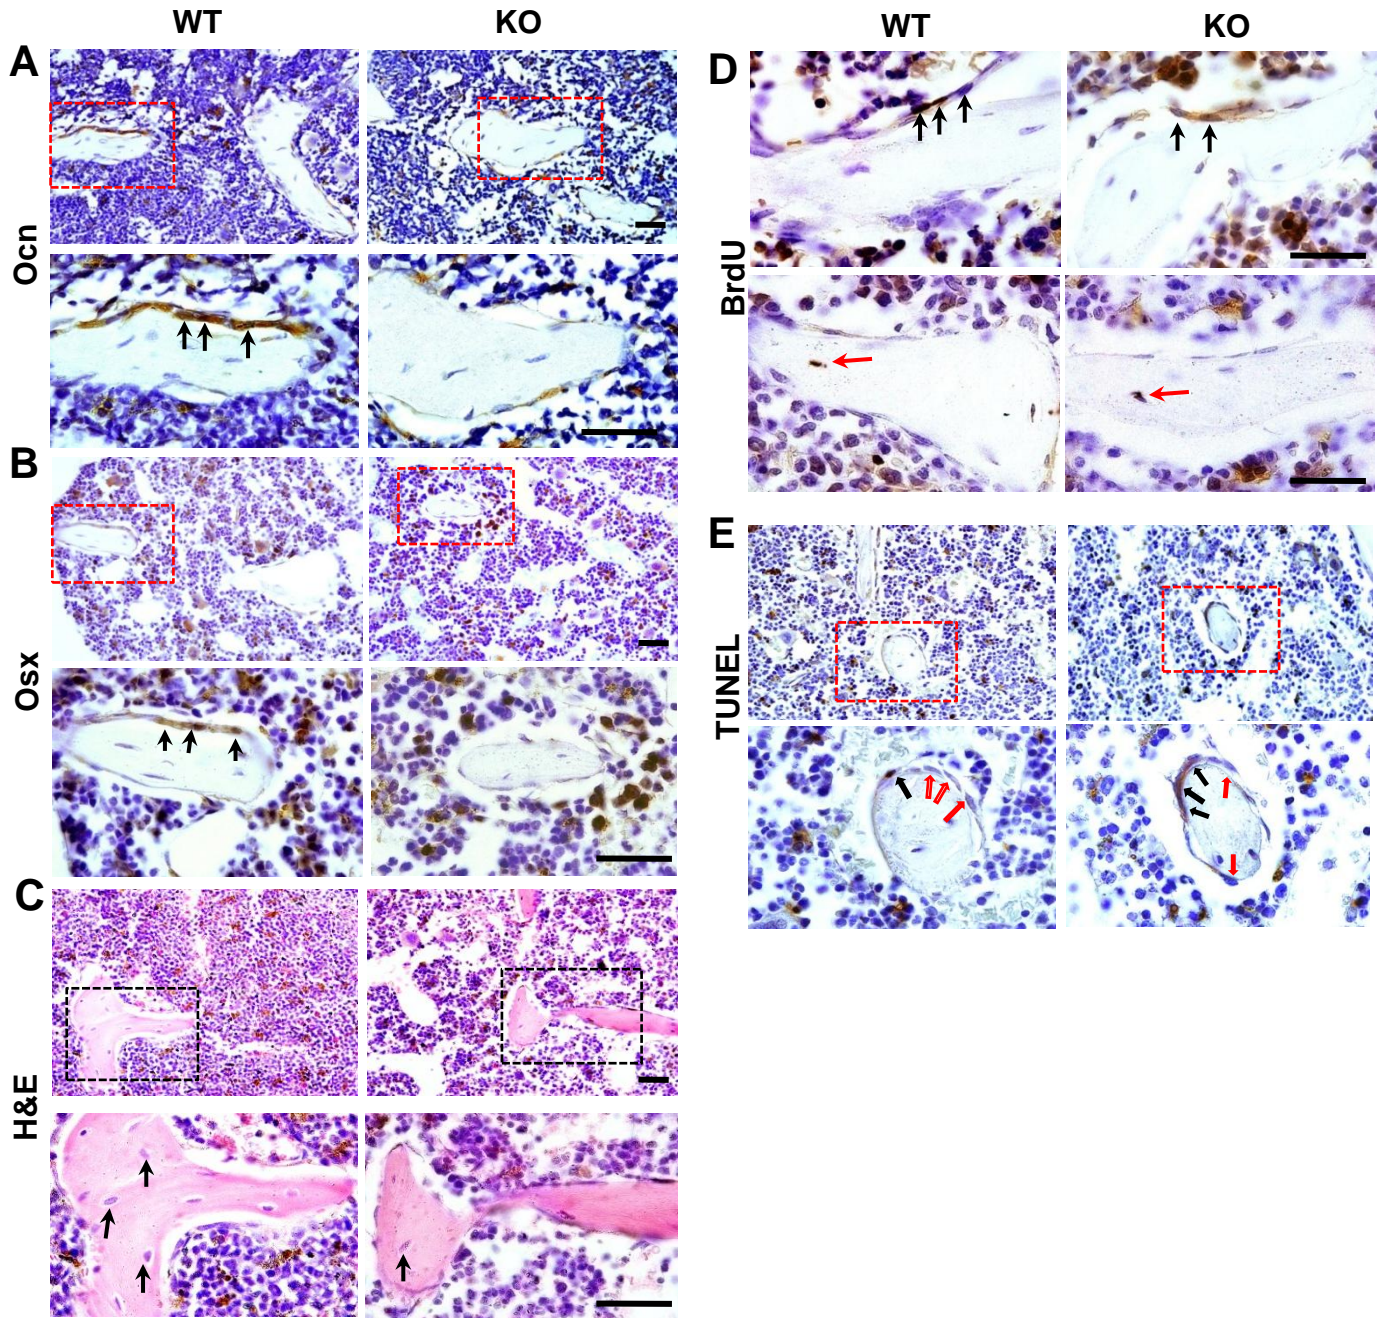

**Fig. S2 Immunohistochemical analysis of femur sections from 3 month-old WT and KO mice.** (A) Immunohistochemical analysis of osteocalcin (Ocn). Arrows indicate Ocn<sup>+</sup> osteoblasts on bone surface. Scale bars: 100µM. (B) Immunohistochemical analysis of osterix (Osx). Arrows, Osx<sup>+</sup> cells on bone surface. Scale bars: 100µM. (C) Light micrographs of H&E staining performed on trabecular bone sections from distal femora. Scale bars: 100µM. Arrows indicate osteocytes. (D) BrdU labeling. Scale bars: 100µM. Black arrows, BrdU<sup>+</sup> cells on bone surface. Red arrows, BrdU<sup>+</sup> cells embedded in bone matrix. (E) Immunohistochemical analysis of TUNEL<sup>+</sup> cells in femur sections of 3 month-old WT and KO mice. Black arrow: TUNEL<sup>+</sup> osteoblasts, red arrow: TUNEL<sup>-</sup> osteoblasts. Scale bars: 100µM.

**Fig. S3**

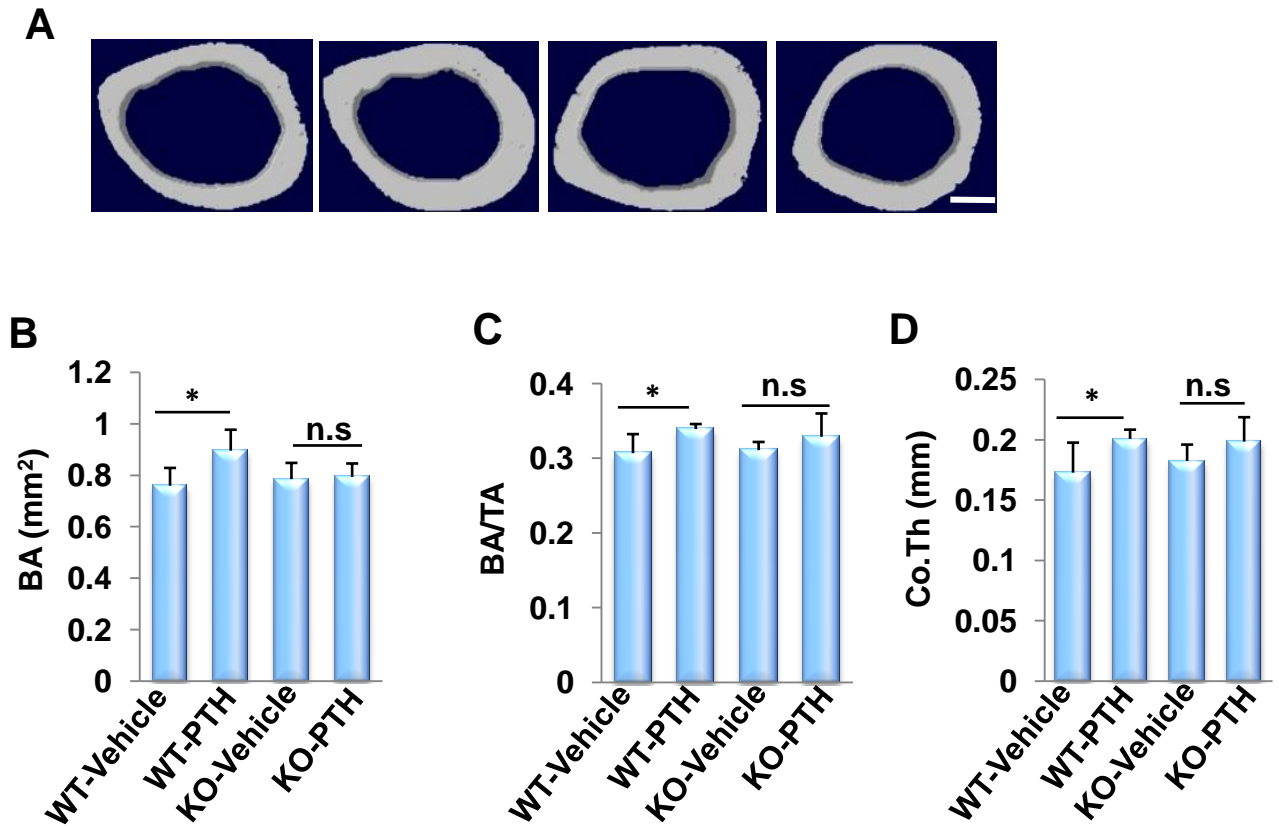

**Fig. S3. Analysis of cortical bone changes in vehicle- or PTH-treated WT and LRP6 KO mice.** (A) Representative  $\mu$ CT images of cross-sections of femoral mid-diaphyses from 3 month-old male mice treated with vehicle or PTH1-34 (80 $\mu$ g/kg. b.w, five days a week for four weeks). Scale bar: 500 $\mu$ M. (B-D) Quantitative  $\mu$ CT analysis of the cortical bone tissue. Cortical bone area (BA) (B), cortical bone area as a percentage of total area within the periosteal circumference (BA/TA) (C), and cortical bone thickness (Co.Th) (D).  $n = 10$ ; \* $p < 0.05$ . Data are presented as mean  $\pm$  SEM.
